# Supplementary material
Source: PubMed Central journal article supplement (PMC4579049)
Supplement: NIHMS709719-supplement-Tables.pdf [file NIHMS709719-supplement-Tables.pdf]

**TABLE I. Clinical Characteristics of the Participants [5]**

| AGE | BMI ( $\frac{kg}{m^2}$ ) |
|-----|--------------------------|
| 28  | 20.8                     |
| 41  | 23.6                     |
| 41  | 22.5                     |
| 24  | 20.7                     |
| 23  | 27.4                     |
| 26  | 25.2                     |
| 23  | 29.3                     |
| 37  | 29.6                     |
| 44  | 29.9                     |
| 42  | 22.9                     |

BMI refers to Body Mass Index. None of the participants had a current diagnosis of depression.

**TABLE II. The estimated model parameters for the fits to the experimental ACTH and cortisol time series**

| Participant | $\theta_1(\text{min}^{-1})$ | $\theta_2(\text{min}^{-1})$ | $\theta_3(\text{min}^{-1})$ | $\theta_4(\text{min}^{-1})$ | $\theta_5(\text{min}^{-1})$ |
|-------------|-----------------------------|-----------------------------|-----------------------------|-----------------------------|-----------------------------|
| 1           | 0.0043                      | $4.2 \times 10^{-7}$        | 561                         | 0.5044                      | 0.0510                      |
| 2           | 0.0046                      | $2.4 \times 10^{-7}$        | 530                         | 0.6513                      | 0.0549                      |
| 3           | 0.0054                      | $2.5 \times 10^{-7}$        | 997                         | 0.9162                      | 0.1055                      |
| 4           | 0.0082                      | $1.6 \times 10^{-7}$        | 335                         | 0.9788                      | 0.0506                      |
| 5           | 0.0054                      | $2.8 \times 10^{-7}$        | 804                         | 0.9959                      | 0.1092                      |
| 6           | 0.0062                      | $1.9 \times 10^{-7}$        | 792                         | 0.9995                      | 0.0914                      |
| 7           | 0.0060                      | $1.3 \times 10^{-7}$        | 1161                        | 0.4494                      | 0.1122                      |
| 8           | 0.0070                      | $1.4 \times 10^{-7}$        | 382                         | 0.7089                      | 0.0573                      |
| 9           | 0.0045                      | $1.1 \times 10^{-7}$        | 205                         | 0.1953                      | 0.0488                      |
| 10          | 0.0035                      | $2.6 \times 10^{-7}$        | 548                         | 0.8185                      | 0.0919                      |
| Median      | 0.0054                      | $2.2 \times 10^{-7}$        | 554                         | 0.7637                      | 0.0743                      |

The parameter  $\theta_1$  is the estimated infusion rate of ACTH from the anterior pituitary into the circulation;  $\theta_2$  is the estimated cortisol negative feedback gain;  $\theta_3$  is the estimated ACTH gain;  $\theta_4$  is the estimated coefficient corresponding to infusion of cortisol into the circulation from the adrenal glands and  $\theta_5$  is the estimated coefficient corresponding to clearance of cortisol by the liver.

**TABLE III. The estimated number of pulses and the squares of the multiple correlation coefficients ( $R^2$ ) for the fits to the experimental ACTH and cortisol time series**

| participant | M  | N  | $R_C^2$ | $R_A^2$ |
|-------------|----|----|---------|---------|
| 1           | 18 | 18 | 0.94    | 0.74    |
| 2           | 17 | 17 | 0.88    | 0.65    |
| 3           | 16 | 16 | 0.94    | 0.66    |
| 4           | 17 | 17 | 0.88    | 0.73    |
| 5           | 18 | 15 | 0.89    | 0.52    |
| 6           | 20 | 15 | 0.92    | 0.58    |
| 7           | 16 | 17 | 0.91    | 0.51    |
| 8           | 16 | 16 | 0.89    | 0.79    |
| 9           | 16 | 17 | 0.83    | 0.67    |
| 10          | 20 | 17 | 0.82    | 0.46    |
| Median      | 17 | 17 | 0.89    | 0.66    |

$M$  is the estimated number of cortisol pulses using only measurements of cortisol levels, and  $N$  is the estimated number of ACTH pulses using concurrent measurements of ACTH and cortisol levels.  $R_C^2$  and  $R_A^2$  are the square of the multiple correlation coefficient for cortisol and ACTH time series, respectively.
